# Supplementary material for: Association Between Depression and Clinical Outcomes in Patients With Hypertrophic Cardiomyopathy
Source: PubMed Central journal article supplement — J Am Heart Assoc. 2021 Apr 9;10(8):e019071. doi: 10.1161/JAHA.120.019071 (PMC8174176; doi:10.1161/jaha.120.019071), 2021-04-09
Supplement: JAH3-10-e019071-s001.pdf [file JAH3-10-e019071-s001.pdf]

# **SUPPLEMENTAL MATERIAL**

**Table S1. Clinical features of 33 patients with depression experiencing HCM-related SCD events.**

| Patients | Age, y | Sex | NYHA Class | LVEF, % | MLVT, mm | Risk Factors    | Events         | Time to events, month |
|----------|--------|-----|------------|---------|----------|-----------------|----------------|-----------------------|
| 1        | 21     | M   | I          | 70      | 16       | VT              | Death          | 38                    |
| 2        | 22     | F   | I          | 67      | 18       | US              | Death          | 42                    |
| 3        | 24     | F   | I          | 64      | 16       | FH-SCD          | Aborted arrest | 28                    |
| 4        | 24     | M   | II         | 66      | 22       | LVOTO           | Death          | 17                    |
| 5        | 29     | M   | II         | 58      | 31       | MLVT, VT, US    | ICD discharge  | 56                    |
| 6        | 32     | F   | I          | 66      | 24       | US              | Death          | 50                    |
| 7        | 33     | M   | I          | 72      | 21       | VT              | ICD discharge  | 33                    |
| 8        | 33     | M   | II         | 67      | 24       | LVOTO           | ICD discharge  | 16                    |
| 9        | 35     | F   | III        | 54      | 29       | None            | Death          | 52                    |
| 10       | 36     | F   | I          | 60      | 16       | US              | ICD discharge  | 10                    |
| 11       | 37     | M   | I          | 66      | 32       | MLVT            | Aborted arrest | 6                     |
| 12       | 37     | F   | II         | 67      | 18       | US              | ICD discharge  | 16                    |
| 13       | 39     | F   | I          | 71      | 25       | None            | Death          | 35                    |
| 14       | 40     | M   | II         | 65      | 25       | FH-SCD          | Death          | 42                    |
| 15       | 41     | M   | I          | 60      | 24       | None            | Death          | 30                    |
| 16       | 42     | F   | I          | 62      | 19       | None            | Death          | 56                    |
| 17       | 44     | M   | I          | 65      | 32       | MLVT, LVOTO, US | ICD discharge  | 12                    |
| 18       | 44     | M   | I          | 54      | 27       | None            | Death          | 15                    |
| 19       | 47     | M   | I          | 65      | 25       | US, VT          | ICD discharge  | 5                     |
| 20       | 48     | F   | III        | 35      | 16       | VT              | Death          | 23                    |
| 21       | 51     | M   | I          | 56      | 15       | None            | Death          | 50                    |
| 22       | 53     | F   | II         | 45      | 19       | FH-SCD, VT      | ICD discharge  | 47                    |
| 23       | 53     | F   | II         | 67      | 22       | LVOTO, FH-SCD   | Death          | 25                    |
| 24       | 55     | M   | I          | 66      | 23       | LVOTO           | Death          | 9                     |
| 25       | 60     | F   | II         | 53      | 29       | FH-SCD, VT      | ICD discharge  | 47                    |
| 26       | 60     | F   | I          | 67      | 22       | LVOTO, VT       | Death          | 33                    |
| 27       | 64     | M   | I          | 60      | 20       | None            | Aborted arrest | 8                     |
| 28       | 64     | M   | I          | 56      | 19       | US              | Death          | 28                    |
| 29       | 67     | F   | II         | 65      | 18       | LVOTO, FH-SCD   | Death          | 38                    |
| 30       | 68     | M   | II         | 48      | 15       | None            | Death          | 52                    |
| 31       | 68     | F   | I          | 56      | 22       | None            | Death          | 18                    |
| 32       | 71     | M   | III        | 56      | 27       | LVOTO           | Death          | 44                    |
| 33       | 73     | M   | I          | 70      | 21       | None            | Death          | 39                    |

HCM indicates hypertrophic cardiomyopathy; SCD, sudden cardiac death; NYHA, New York Heart Association; LVEF, left ventricle ejection fraction; MLVT, Maximum left ventricle thickness; VT, ventricular tachycardia on ambulatory Holter; US, Unexplained syncope; FH-SCD, Family history of sudden cardiac death; LVOTO, left ventricular outflow tract obstruction; MLVT, Maximum LV wall thickness  $\geq 30$ mm; ICD, implantable cardioverter defibrillator.

**Table S2. Clinical characteristics of the patients classified by level of depression symptoms.**

| Characteristics                   | Percent of patients with events (n) |                      |                       |                    | P value |
|-----------------------------------|-------------------------------------|----------------------|-----------------------|--------------------|---------|
|                                   | HDRS <8<br>(n=463)                  | HDRS 8-13<br>(n=148) | HDRS 14-18<br>(n=122) | HDRS ≥19<br>(n=87) |         |
| Demographics                      |                                     |                      |                       |                    |         |
| Age, mean±SD, y                   | 48.2±12.9                           | 48.1±12.8            | 47.9±12.6             | 48.5±12.6          | 0.62    |
| Male, n (%)                       | 266 (57.5)                          | 88 (59.5)            | 66 (54.1)             | 50 (57.5)          | 0.23    |
| BMI, mean±SD, kg/m <sup>2</sup>   | 24.7±3.9                            | 24.8±3.6             | 24.3±3.7              | 24.4±3.7           | 0.58    |
| Maximum LV thickness, mean±SD, mm | 20.2±4.8                            | 20.0±4.7             | 20.1±4.6              | 20.2±4.5           | 0.87    |
| NYHA class, n (%)                 |                                     |                      |                       |                    |         |
| I/II                              | 413 (89.2)                          | 130 (87.8)           | 106 (86.9)            | 76 (87.4)          | 0.44    |
| III/IV                            | 50 (10.8)                           | 18 (12.2)            | 16 (13.1)             | 11 (12.6)          | 0.19    |
| Comorbid condition, n (%)         |                                     |                      |                       |                    |         |
| Atrial fibrillation               | 43 (9.3)                            | 15 (10.1)            | 11 (9.0)              | 9 (10.3)           | 0.53    |
| Stroke history                    | 3 (0.6)                             | 3 (2.0)              | 2 (1.6)               | 2 (2.3)            | 0.77    |
| Diabetes                          | 63 (13.6)                           | 18 (12.2)            | 17 (13.9)             | 13 (14.9)          | 0.63    |
| Hypertension                      | 77 (16.6)                           | 24 (16.2)            | 21 (17.2)             | 17 (19.5)          | 0.16    |
| Risk factors, n (%)               |                                     |                      |                       |                    |         |
| Non-sustained VT on Holter        | 80 (17.3)                           | 27 (18.2)            | 22 (18.0)             | 18 (20.7)          | 0.12    |
| Unexplained syncope               | 40 (8.6)                            | 13 (8.8)             | 10 (8.2)              | 10 (11.5)          | 0.11    |
| Family history of SCD             | 48 (10.4)                           | 20 (13.5)            | 19 (15.6)             | 18 (20.7)          | 0.03    |
| LVOTO                             | 95 (20.5)                           | 33 (22.3)            | 33 (27.0)             | 21 (24.1)          | 0.04    |
| Maximum LV wall thickness ≥ 30mm  | 22 (4.8)                            | 7 (4.7)              | 6 (4.9)               | 4 (4.6)            | 0.77    |
| Echocardiography, mean ± SD       |                                     |                      |                       |                    |         |
| LVEF (%)                          | 63.3±6.7                            | 61.2±6.3             | 62.5±6.2              | 61.0±6.0           | 0.79    |
| Left atrial diameter              | 39.6±9.7                            | 40.2±9.5             | 39.9±9.3              | 40.2±9.0           | 0.65    |
| ICD implantation                  |                                     |                      |                       |                    |         |
| ICD, n (%)                        | 48 (10.4)                           | 15 (10.1)            | 13 (10.7)             | 9 (10.3)           | 0.78    |
| Medications at discharge, n (%)   |                                     |                      |                       |                    |         |
| β-Blockers                        | 290 (62.6)                          | 99 (66.9)            | 77 (63.1)             | 52 (59.8)          | 0.19    |
| Calcium channel blockers          | 79 (17.1)                           | 27 (18.2)            | 23 (18.9)             | 16 (18.4)          | 0.74    |
| RAAS inhibitors                   | 72 (15.6)                           | 23 (15.5)            | 21 (17.2)             | 14 (16.1)          | 0.69    |
| Diuretic                          | 34 (7.3)                            | 11 (7.4)             | 8 (6.6)               | 6 (6.9)            | 0.48    |
| Amiodarone                        | 11 (2.4)                            | 5 (3.4)              | 4 (3.3)               | 2 (2.3)            | 0.65    |
| Laboratory parameters, mean ± SD  |                                     |                      |                       |                    |         |
| Pro-BNP (pg/mL)                   | 641.0±513.5                         | 589.4±502.0          | 599.0±493.5           | 584.0±471.1        | 0.32    |
| Creatinine (umol/L)               | 75.2±14.2                           | 73.9±13.9            | 74.1±13.8             | 74.2±13.6          | 0.52    |
| HDRS score                        | 4.5±2.5                             | 10.3±2.6             | 16.1±1.8              | 22.6±3.2           | <0.001  |

HDRS indicates 17-item Hamilton Depression Rating Scale; SD, standard deviation; BMI, body mass index; LV, left ventricle; NYHA, New York Heart Association; VT, ventricular tachycardia; SCD, sudden cardiac death; LVOTO, left ventricular outflow tract obstruction; LVEF; left ventricular ejection fraction; ICD, implantable cardioverter defibrillator; RAAS, rennin-angiotensin-aldosterone system; Pro-BNP, pro-brain natriuretic peptide.

**Figure S1.** Clinical profile of sudden death events and HCM-related heart failure events

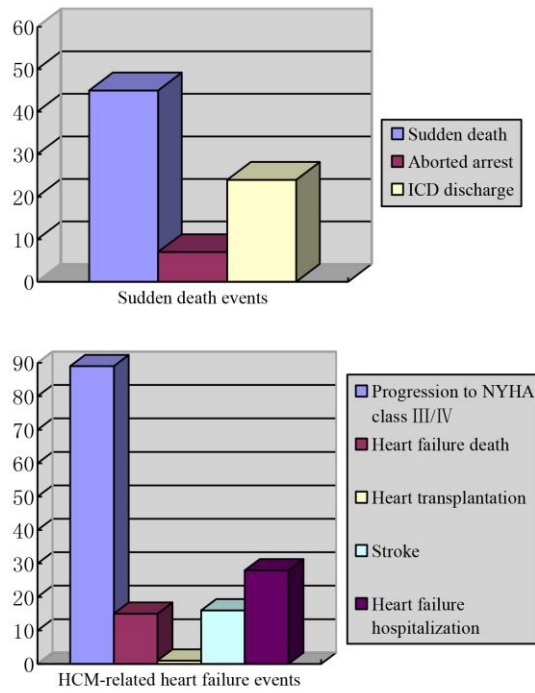

HCM indicates hypertrophic cardiomyopathy; ICD, implantable cardioverter defibrillator; NYHA, New York Heart Association.
